# Supplementary material
Source: PubMed Central journal article supplement (PMC534514)

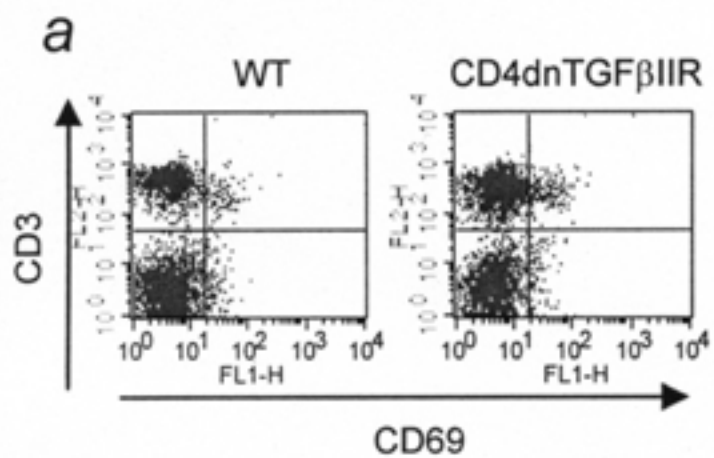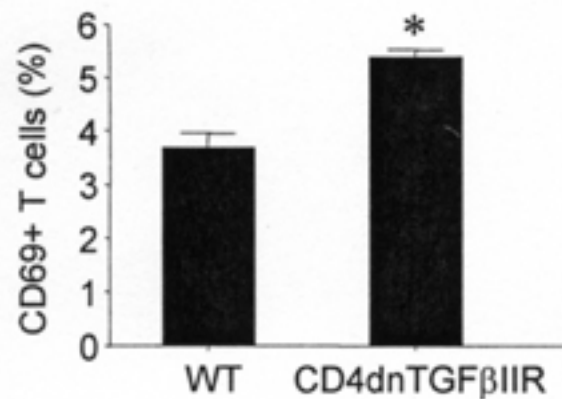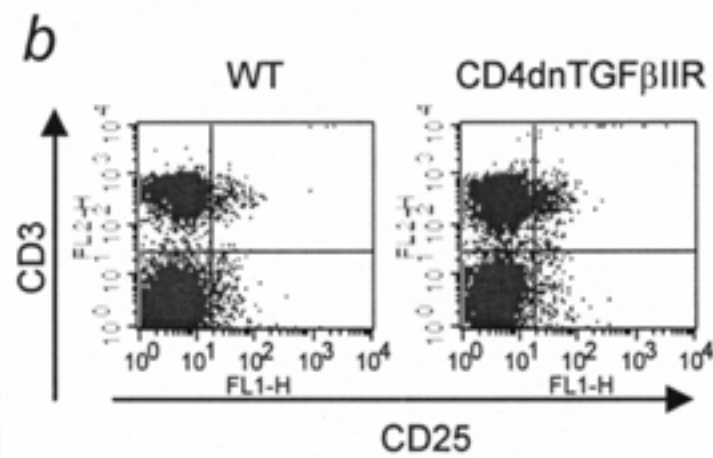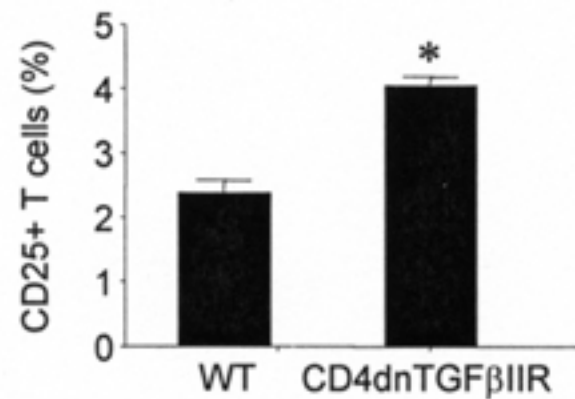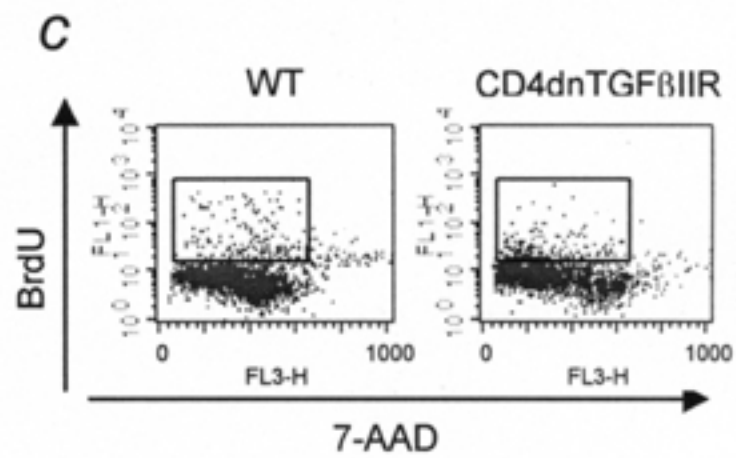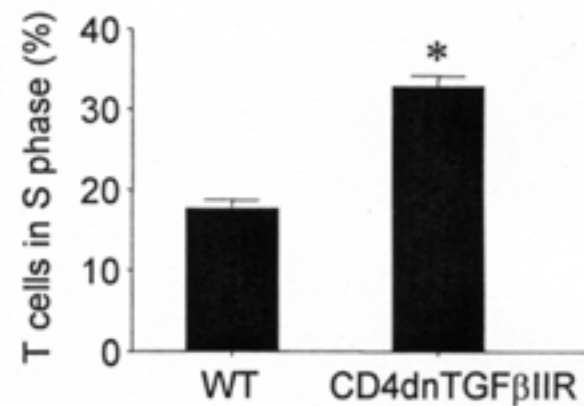

Supplement: pnas_101_47_16618__1.pdf [file pnas_101_47_16618__1.pdf]

**a**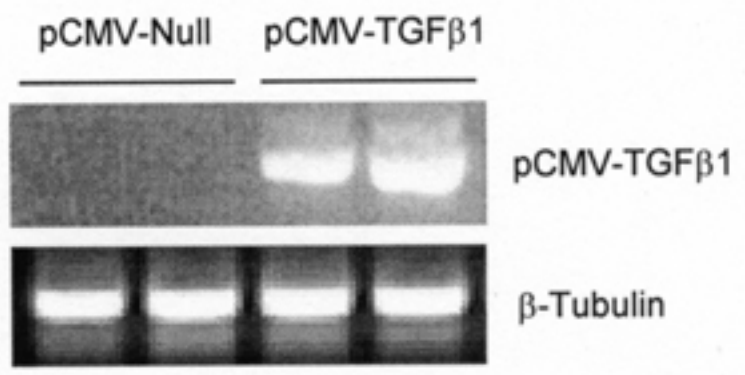**b**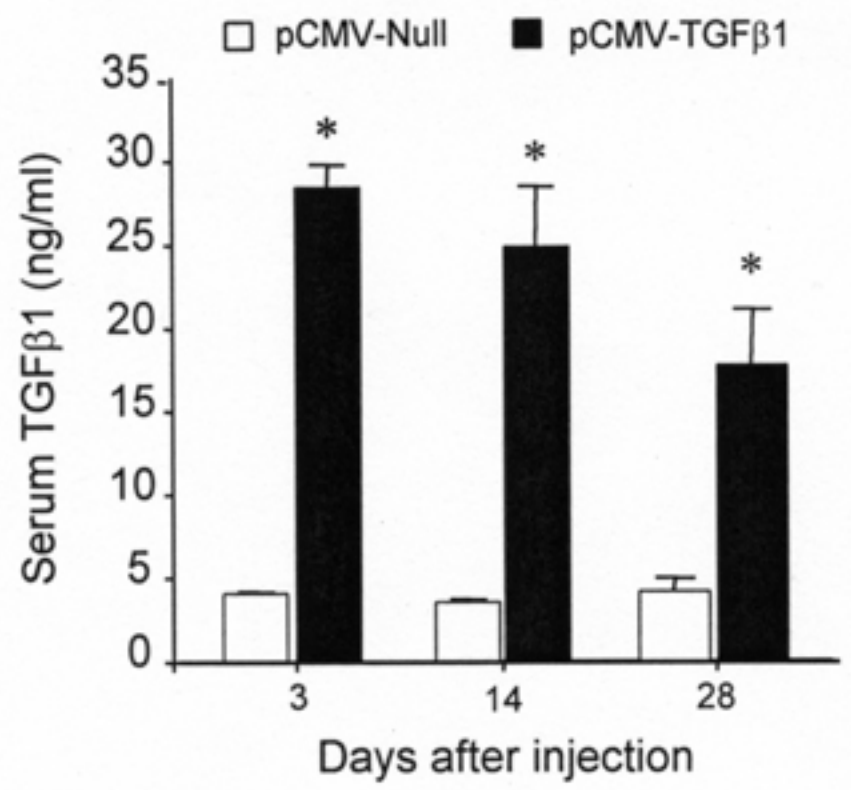**c**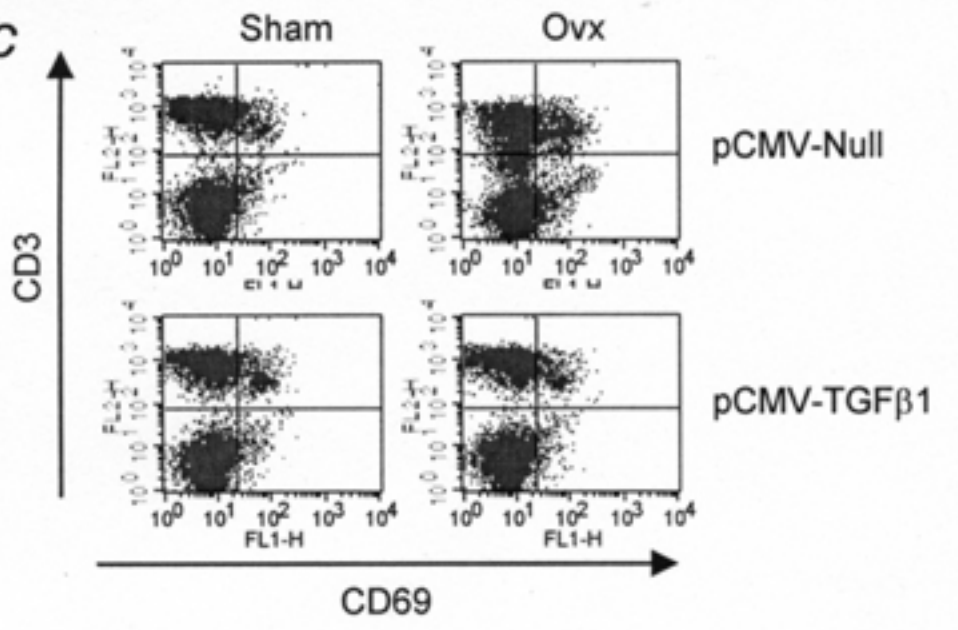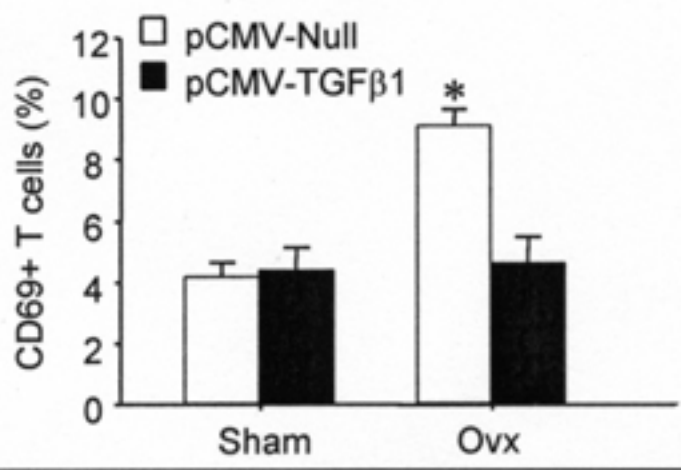**d**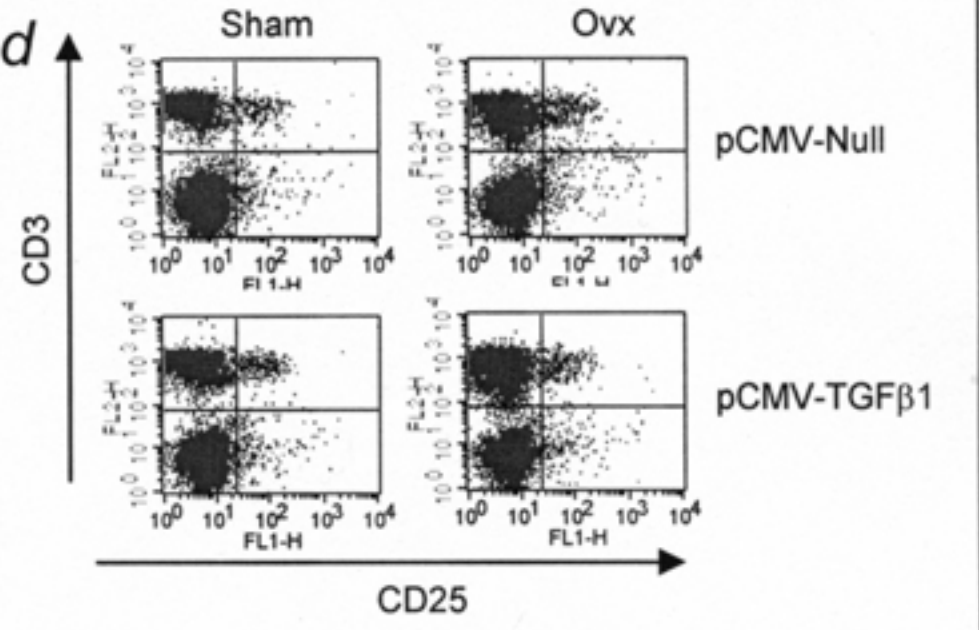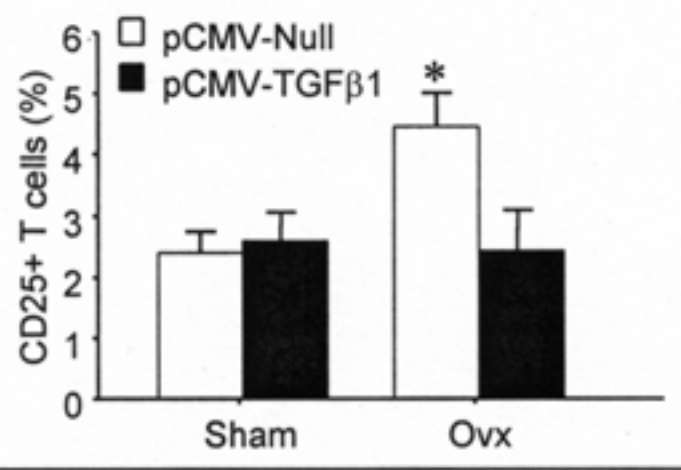

Supplement: pnas_101_47_16618__2.pdf [file pnas_101_47_16618__2.pdf]
